# Supplementary material for: Clinical Status, Nutritional Behavior, and Lifestyle, and Determinants of Community Well-Being of Patients from the Perspective of Physicians: A Cross-Sectional Study of Young Older Adults, Nonagenarians, and Centenarians in Salerno and Province, Italy
Source: MDPI journal article supplement (doi:10.3390/nu14173665), 2022-09-05

**Figure S2.** Medical field of physicians who responded to the questionnaire. Number for each item may not add up to total number of study population due to missing value.

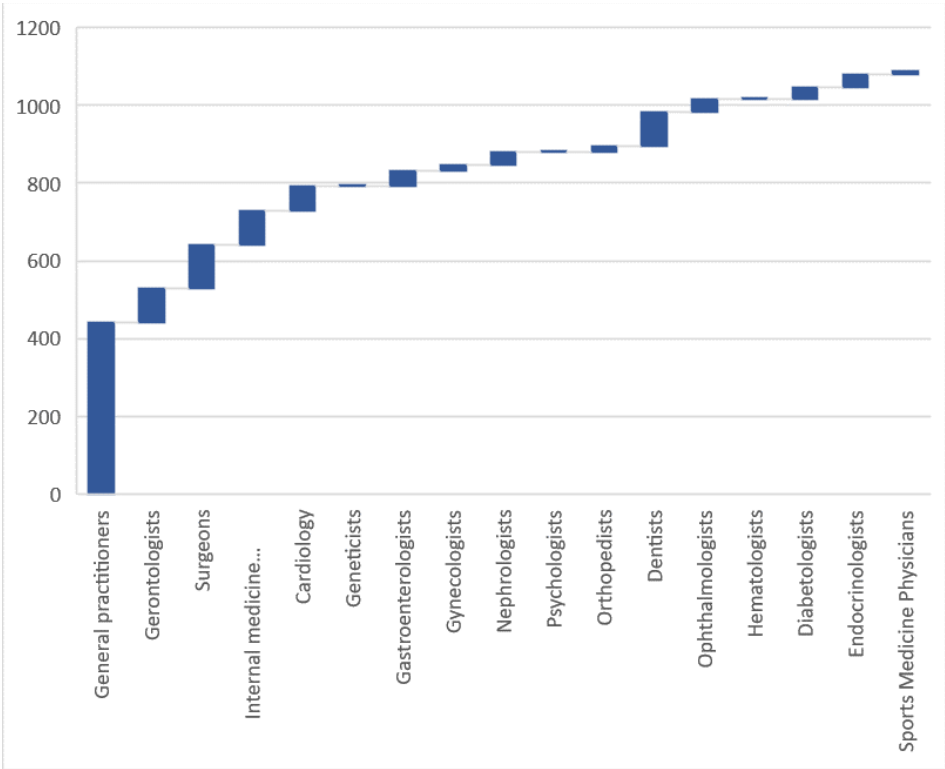

Supplement: s1 [file s1]
