# Supplementary material for: Clinical Status, Nutritional Behavior, and Lifestyle, and Determinants of Community Well-Being of Patients from the Perspective of Physicians: A Cross-Sectional Study of Young Older Adults, Nonagenarians, and Centenarians in Salerno and Province, Italy
Source: MDPI journal article supplement (doi:10.3390/nu14173665), 2022-09-05
Supplement: s1 [file s1]

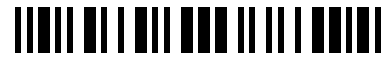

**A7. What do you estimate the percentage of comorbidities in the centenarians?**

Comorbidities centenarians

|  |  |  |  |  |  |  |  |  |  |
|--|--|--|--|--|--|--|--|--|--|
|  |  |  |  |  |  |  |  |  |  |
|--|--|--|--|--|--|--|--|--|--|

**B1. Can you estimate how many drugs the average old and centenarians take?**

Old people

|  |  |  |  |  |  |  |  |  |  |
|--|--|--|--|--|--|--|--|--|--|
|  |  |  |  |  |  |  |  |  |  |
|--|--|--|--|--|--|--|--|--|--|

Centenarians

|  |  |  |  |  |  |  |  |  |  |
|--|--|--|--|--|--|--|--|--|--|
|  |  |  |  |  |  |  |  |  |  |
|--|--|--|--|--|--|--|--|--|--|

**B2. Please estimate what percentage of the old and centenarians use tobacco regularly?**

Old people

|  |  |  |  |  |  |  |  |  |  |
|--|--|--|--|--|--|--|--|--|--|
|  |  |  |  |  |  |  |  |  |  |
|--|--|--|--|--|--|--|--|--|--|

Centenarians

|  |  |  |  |  |  |  |  |  |  |
|--|--|--|--|--|--|--|--|--|--|
|  |  |  |  |  |  |  |  |  |  |
|--|--|--|--|--|--|--|--|--|--|

**B3. Please estimate what percentage of the old and centenarians regularly consume alcohol?**

Old people

|  |  |  |  |  |  |  |  |  |  |
|--|--|--|--|--|--|--|--|--|--|
|  |  |  |  |  |  |  |  |  |  |
|--|--|--|--|--|--|--|--|--|--|

Centenarians

|  |  |  |  |  |  |  |  |  |  |
|--|--|--|--|--|--|--|--|--|--|
|  |  |  |  |  |  |  |  |  |  |
|--|--|--|--|--|--|--|--|--|--|

**B4. Please estimate what percentage of the old and centenarians suffer from alcohol dependence?**

Old people

|  |  |  |  |  |  |  |  |  |  |
|--|--|--|--|--|--|--|--|--|--|
|  |  |  |  |  |  |  |  |  |  |
|--|--|--|--|--|--|--|--|--|--|

Centenarians

|  |  |  |  |  |  |  |  |  |  |
|--|--|--|--|--|--|--|--|--|--|
|  |  |  |  |  |  |  |  |  |  |
|--|--|--|--|--|--|--|--|--|--|

**B5. Please estimate what percentage of smokers among the old and centenarians exhibit addictive behaviors?**

Old people

|  |  |  |  |  |  |  |  |  |  |
|--|--|--|--|--|--|--|--|--|--|
|  |  |  |  |  |  |  |  |  |  |
|--|--|--|--|--|--|--|--|--|--|

Centenarians

|  |  |  |  |  |  |  |  |  |  |
|--|--|--|--|--|--|--|--|--|--|
|  |  |  |  |  |  |  |  |  |  |
|--|--|--|--|--|--|--|--|--|--|

**C1. How high do you rate the importance of nutrition in the care of your patients?**

very high      rather high      neither      rather low      very low      do not know

Nutrition importance

|  |  |  |  |  |  |
|--|--|--|--|--|--|
|  |  |  |  |  |  |
|--|--|--|--|--|--|

**C2. How important are the following aspects for the nutrition of older people:**

very important      important      rather important      rather unimportant      unimportant      totally unimportant      do not know

Variety and freshness of (often regional) foods

|  |  |  |  |  |  |  |
|--|--|--|--|--|--|--|
|  |  |  |  |  |  |  |
|--|--|--|--|--|--|--|

Consumption of ready meals

|  |  |  |  |  |  |  |
|--|--|--|--|--|--|--|
|  |  |  |  |  |  |  |
|--|--|--|--|--|--|--|

Daily consumption of bottled water

|  |  |  |  |  |  |  |
|--|--|--|--|--|--|--|
|  |  |  |  |  |  |  |
|--|--|--|--|--|--|--|



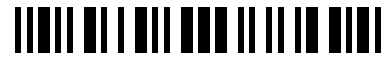

**E1. What percentage of older people and centenarians are on their own or receive constant support? Life in the family**

Old people

|  |  |  |  |  |  |  |  |  |  |
|--|--|--|--|--|--|--|--|--|--|
|  |  |  |  |  |  |  |  |  |  |
|--|--|--|--|--|--|--|--|--|--|

Centenarians

|  |  |  |  |  |  |  |  |  |  |
|--|--|--|--|--|--|--|--|--|--|
|  |  |  |  |  |  |  |  |  |  |
|--|--|--|--|--|--|--|--|--|--|

**E2. What percentage of older people and centenarians are on their own or receive constant support? Living alone with family support**

Old people

|  |  |  |  |  |  |  |  |  |  |
|--|--|--|--|--|--|--|--|--|--|
|  |  |  |  |  |  |  |  |  |  |
|--|--|--|--|--|--|--|--|--|--|

Centenarians

|  |  |  |  |  |  |  |  |  |  |
|--|--|--|--|--|--|--|--|--|--|
|  |  |  |  |  |  |  |  |  |  |
|--|--|--|--|--|--|--|--|--|--|

**E3. What percentage of older people and centenarians are on their own or receive constant support? Living alone with support from third parties (neighbors, care services, etc.)**

Old people

|  |  |  |  |  |  |  |  |  |  |
|--|--|--|--|--|--|--|--|--|--|
|  |  |  |  |  |  |  |  |  |  |
|--|--|--|--|--|--|--|--|--|--|

Centenarians

|  |  |  |  |  |  |  |  |  |  |
|--|--|--|--|--|--|--|--|--|--|
|  |  |  |  |  |  |  |  |  |  |
|--|--|--|--|--|--|--|--|--|--|

**E4. What percentage of older people and centenarians are on their own or receive constant support? Living in senior and nursing facilities or shared apartments**

Old people

|  |  |  |  |  |  |  |  |  |  |
|--|--|--|--|--|--|--|--|--|--|
|  |  |  |  |  |  |  |  |  |  |
|--|--|--|--|--|--|--|--|--|--|

Centenarians

|  |  |  |  |  |  |  |  |  |  |
|--|--|--|--|--|--|--|--|--|--|
|  |  |  |  |  |  |  |  |  |  |
|--|--|--|--|--|--|--|--|--|--|

**F1. How important do you consider the following aspects of lifestyle to be for a fulfilling old age?**

very  
important

important

rather  
important

rather  
unimportant

unimportant

totally  
unimportant

do not  
know

Continuation of professional tasks

|  |  |  |  |  |  |  |  |
|--|--|--|--|--|--|--|--|
|  |  |  |  |  |  |  |  |
|--|--|--|--|--|--|--|--|

Honorary office (Ital.: carica onorifica)

|  |  |  |  |  |  |  |  |
|--|--|--|--|--|--|--|--|
|  |  |  |  |  |  |  |  |
|--|--|--|--|--|--|--|--|

Physical activities (gardening, sports, yoga, etc.)

|  |  |  |  |  |  |  |  |
|--|--|--|--|--|--|--|--|
|  |  |  |  |  |  |  |  |
|--|--|--|--|--|--|--|--|

Fixed rituals (ital.: rituali fissati)

|  |  |  |  |  |  |  |  |
|--|--|--|--|--|--|--|--|
|  |  |  |  |  |  |  |  |
|--|--|--|--|--|--|--|--|

Social contacts

|  |  |  |  |  |  |  |  |
|--|--|--|--|--|--|--|--|
|  |  |  |  |  |  |  |  |
|--|--|--|--|--|--|--|--|

Parish

|  |  |  |  |  |  |  |  |
|--|--|--|--|--|--|--|--|
|  |  |  |  |  |  |  |  |
|--|--|--|--|--|--|--|--|

Coffee shop/regular coffee meetings

|  |  |  |  |  |  |  |  |
|--|--|--|--|--|--|--|--|
|  |  |  |  |  |  |  |  |
|--|--|--|--|--|--|--|--|

Associations

|  |  |  |  |  |  |  |  |
|--|--|--|--|--|--|--|--|
|  |  |  |  |  |  |  |  |
|--|--|--|--|--|--|--|--|

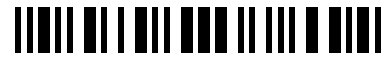

**G1. Are the majority of centenarians especially grateful for a long life?**

Yes ☐

No ☐

undecided ☐

**G2. Do the majority of centenarians suffer particularly often from the "burden of not being able to die"?**

Yes ☐

No ☐

undecided ☐

**H1. From your professional experience, how do you evaluate the health care system in the province of Salerno?**

|                                                                   | very good                | good                     | partly<br>partly         | poor                     | Very poor                | not<br>specified         |
|-------------------------------------------------------------------|--------------------------|--------------------------|--------------------------|--------------------------|--------------------------|--------------------------|
| Hospital Equipment                                                | <input type="checkbox"/> |
| Cooperation of the main institutions                              | <input type="checkbox"/> |
| Informing the public about health care                            | <input type="checkbox"/> |
| Cooperation between clinics and physicians in private<br>practice | <input type="checkbox"/> |
| Cooperation between clinics and rehab facilities                  | <input type="checkbox"/> |
| Cooperation between clinics and specialist clinics                | <input type="checkbox"/> |
| Self-help groups                                                  | <input type="checkbox"/> |

**I1. How many of the old and centenarians you treat have tested positive for SARS-CoV-2 virus?**

Asymptomatic

Paucisintomatic

Symptomatic

Symptomatic with severe disease

Deaths

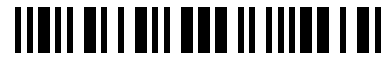

**J1. Your gender?**

Male ☐

Female ☐

Other ☐

Other

**J2. How old are you?**

|  |  |  |  |  |  |  |  |  |  |
|--|--|--|--|--|--|--|--|--|--|
|  |  |  |  |  |  |  |  |  |  |
|--|--|--|--|--|--|--|--|--|--|

**J3. Education and practice of the specialist (physician)?**

General Medicine ☐

Gerontology ☐

Surgery ☐

Internal medicine ☐

Cardiology ☐

Genetics ☐

Gastroenterology ☐

Gynecology ☐

Nephrology ☐

Psychology ☐

Orthopedics ☐

Dentistry ☐

Ophthalmology ☐

Hematology ☐

Diabetology ☐

Endocrinology ☐

Sports Medicine ☐

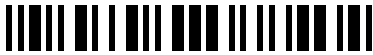

Other

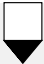

Other

**Thank you for your participation!**
